# Supplementary material
Source: MDPI journal article supplement (https://www.mdpi.com/2673-4532/3/2/13)
Supplement: s1 [file s1]

Archive with 3 entries (3 files):
- Mat Sup FigS1.xlsx
- Mat Sup S2.xlsx
- 04 Figures Sup Mat Captions.pdf
